# Supplementary material for: Mechanism for Regulation of Melanoma Cell Death via Activation of Thermo-TRPV4 and TRPV2
Source: PubMed Central journal article supplement (PMC6383420; doi:10.1155/2019/7362875), 2019-02-07
Supplement: 7362875.f1.pdf [file 7362875.f1.pdf]

# 1 Supplementary Materials

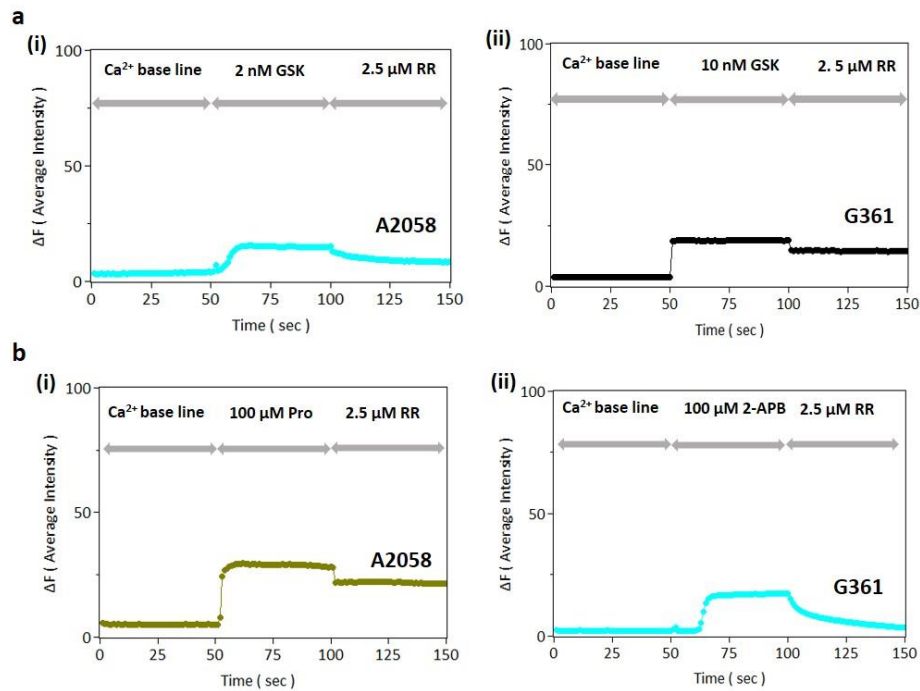

2

3 Figure S1: Functional TRPs distributed in human melanoma cells. (a) Measurement of calcium imaging  
 4 in GSK1016790A application with 2 nM concentration in A2058 (i), (n =25) and G361 (ii), (n = 12, p <  
 5 0.05) melanoma cells, and intracellular calcium slightly enhanced and calcium signal receded after a  
 6 blocker of ruthenium red was applied. (b) Measurement of calcium imaging showed probenecid could  
 7 induce calcium influx which could be blocked by TRP channel blocker of ruthenium red in A2058 cells  
 8 (i), (n = 23, p < 0.01). When 2-APB was applied to G361 cells, there was slight increase in calcium influx  
 9 observed and ruthenium red also made calcium influx receded (ii), (n = 13, p < 0.05).

10

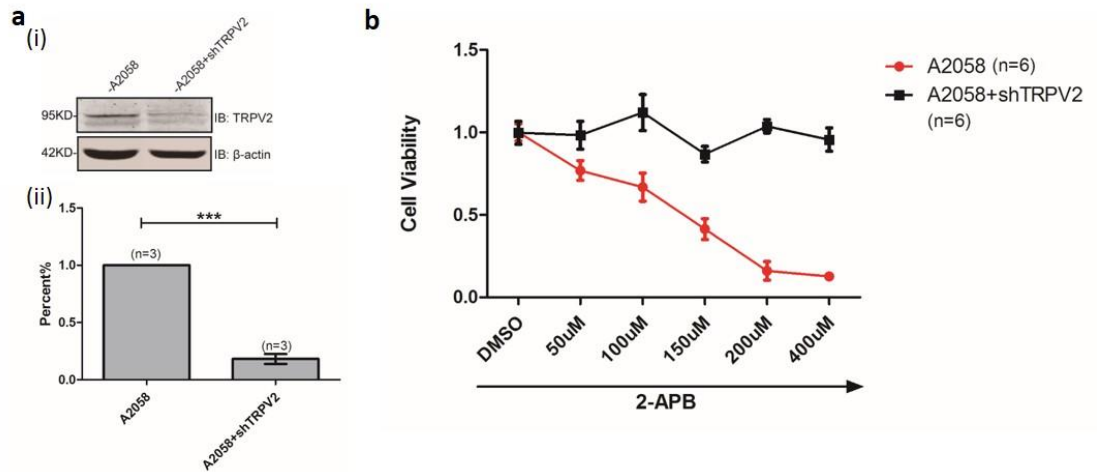

1

2 Figure S2: Knockdown of TRPV2 abolished 2-APB mediating signals. (a) A representative western blot  
 3 indicated the successful knockdown of TRPV2 protein by shRNA (i) & (ii). (b) Loss of TRPV2 fully  
 4 suppressed the inhibition of proliferation for the treatment of 2-APB (50  $\mu$ M, 100  $\mu$ M, 150  $\mu$ M, 200  $\mu$ M,  
 5 400  $\mu$ M) to A2058 melanoma cells.
